# Supplementary material for: Shifting Trade-offs: Finding the Sustainable Nexus of Hydropower and Environmental Flows in the San Joaquin River Watershed, California
Source: Frontiers journal article supplement (doi:10.3389/fenvs.2022.787711), 2022-06-08
Supplement: Table_1.XLSX [file Table_1.XLSX]

## Sheet: IFRs
Location of IFR	River System	Into what River?	IFR Node is in OpenAgua?	Name of existing OpenAgua IFR Node	Req. Type	FERC Project Number associated w/ IFR	USGS Gauge IFR is measured at	Dependencies	OBSOLETE information about WYT - please see more detailed information in the 5 columns to the right	Water Year Type classification - Based on inflows at what location?	Water Year Type classification - what month(s) are the forecast(s) made?	Who is making the forecast - Bureau of Reclamation, CA Department of Water Resources, or Other?	Is the forecast made of April-July runoff or the annual (entire WY) runoff? Or other?	Once the forecast is made, how long is it valid for?	Source Document	Page Number of Source Document (Water Year Type description)	Page Number of Source Document (IFR description)	Operating Condition number for IFR	Currently Excluded From Model? (as of 11-14-19)	If natural inflow is lower than the IFR, is it allowed not meet the IFR (releasing the inflow instead of the IFR)?
At Crocker-Huffman Diversion	Merced	Merced River	Yes	Merced R below Crocker-Huffman Dam	Ramping Rates	P-2179	N/A	None, constant							P-2179_MercedRiverHP_1964_OrderIssuingLicense		5 of 7	Article 42		No
Below Exchequer Dam	Merced	Merced River	Yes	blwNewExchequerPH	MIF	P-2179	11269700	None, constant	None, constant						P-2179_MercedRiverHP_1964_OrderIssuingLicense		4 of 7	Article 40		No
Below Merced Falls At Shaffer Bridge	Merced	Merced River	Yes	Merced R below Crocker-Huffman Dam	Maximum IF	P-2179	11271290	Day of year, Water Year Type	Dry year = when “the forecasted April 1 through July 31 unimpaired runoff, as published in the May 1 bulletin of the California Department of Water Resources for the station, ‘inflow to Exchequer’ is less than 450,000 acre-feet.”	New Exchequer Reservoir	2019-05-01	CDWR	April-July	Not specified	P-2179_MercedRiverHP_1964_OrderIssuingLicense		5 of 7	Article 41		No
Below Merced Falls At Shaffer Bridge	Merced	Merced River	Yes	Merced R below Crocker-Huffman Dam	MIF	P-2179	11271290	Day of year, Water Year Type	Dry year = when “the forecasted April 1 through July 31 unimpaired runoff, as published in the May 1 bulletin of the California Department of Water Resources for the station, ‘inflow to Exchequer’ is less than 450,000 acre-feet.”	New Exchequer Reservoir	2019-05-01	CDWR	April-July	Not specified	P-2179_MercedRiverHP_1964_OrderIssuingLicense		5 of 7	Article 41		No
At confluence of N.F. Stanislaus River and Beaver Creek	Stanislaus	North Fork Stanislaus River	Yes	IFR Confluence of NF and Beaver Creek	MIF	P-2409	11295300	None, constant							P-2409_NorthForkStanislaus_1997_MIF-Releases (Accession # 19971112-0303)		35/38	Director Order (A)		No
Below Angels Diversion dam [also called Utica Ditch Diversion Dam]	Stanislaus	Angels Creek	Yes	IFR bl Angels Div	MIF	P-2699, P-2019	11298700	None, constant							P-2699_AngelsProject_2003_OrderIssuingSubsequentLicense		36/83	SWRCB Condition 1		No
Below Angels Diversion dam [also called Utica Ditch Diversion Dam]	Stanislaus	Angels Creek	Yes	IFR bl Angels Div	Flushing and/or Supplemental Flow	P-2699, P-2019	11298700	Occurance of flow rate threshold exceedence							P-2699_AngelsProject_2004_FlushingFlowSchedule(Submittal).pdf		pg 36-37	Licensee's Plan		No
Below Beardsley Afterbay	Stanislaus	Middle Fork Stanislaus River	Yes	IFR bl Beardsley Afterbay	MIF	P-2975	11292900	Water Year Type and Inflows	defined as dry years by the California Department of water Resources. During a dry water, licensee shall discharge from the Beardsley Afterbay Dam a continuous minimum flow of 50 cfs.	Not specified	February 1, March 1, April 1, and May 1	CDWR	Not specified	Special note: If, during a designated dry year, the Feb 1 or later water predictions of the CDWR indicates that dry year conditions no longer prevail, a flow release of 135 cfs will resume immediately."	P-2975_SandBar_1983_OrderIssuingMajorLicense	2019-08-14	2019-08-14	Article 38	There is a complicated piece of coding that David is handling for this IFR - see https://github.com/vicelab/sierra-pywr/issues/34	Yes
Below Beaver Creek Diversion Dam	Stanislaus	Beaver Creek	Yes	IFR Below Beaver Creek Diverison Dam	MIF	P-2409	11295230	Inflows, threshold							P-2409_NorthForkStanislaus_1982_OrderIssuingMajorLicense		23/46	Article 37		Yes
Below Beaver Creek Diversion Dam	Stanislaus	Beaver Creek	Yes	IFR below Beaver Creek Diversion Dam	Ramping Rates	P-2409	11295230	None, constant							P-2409_NorthForkStanislaus_1982_OrderIssuingMajorLicense		26/46	Article 50		No
Below Donnells Reservoir	Stanislaus	Middle Fork Stanislaus River	Yes	IFR bl Donnells Reservoir	Ramping Rates	P-2005	11292615	None, constant							P-2005_Beardsley-Donnells_2006_IssuingRelicense		82/87	USDA Condition No. 33		No
Below Donnells Reservoir	Stanislaus	Middle Fork Stanislaus River	Yes	IFR bl Donnells Reservoir	MIF	P-2005	11292615	Day of year, Water Year Type	(DWR) forecast for annual unimpaired inflow into New Melones Reservoir. Calculated in February, March, April, and May.	New Melones Reservoir	February 1, March 1, April 1, and May 1	CDWR	Annual	In each of February, March and April, the water-year type shall be based on DWR’s forecast for the month and shall apply from the 10th day of the month through the 9th day of the next month. From May 10 through February 9 of the following calendar year, the water-year type shall be based on DWR’s May 1 forecast.	P-2005_Beardsley-Donnells_2006_IssuingRelicense	78/87	80/87	SWRCB Condition 5-7		No
Below Donnells Reservoir	Stanislaus	Middle Fork Stanislaus River	No	IFR bl Donnells Reservoir	Flushing and/or Supplemental Flow	P-2005	11292700	Reservoir Spill Forecast, Water Year Type, Week Number of Supplemental Flow	California Department of Water Resources (DWR) forecast for annual unimpaired inflow into New Melones Reservoir	New Melones Reservoir	February 1, March 1, April 1, and May 1	CDWR	Annual	In each of February, March and April, the water-year type shall be based on DWR’s forecast for the month and shall apply from the 10th day of the month through the 9th day of the next month. From May 10 through February 9 of the following calendar year, the water-year type shall be based on DWR’s May 1 forecast.	P-2005_Beardsley-Donnells_2006_IssuingRelicense	78/87	79-82/87	SWRCB Condition 5-7		No
Below Goodwin Dam	Stanislaus	Stanislaus River	Yes	IFR below Goodwin Reservoir	MIF	N/A	11302000	Water year Type		New Melones Reservoir	January, February, March, April, May	DWR	NMI Parameter = Actual end of Feb storage + Actual inflows from March through the most recent month + Forecasted inflows to New Melones from the current month through September. (Note: Forecasted inflows are calculated as the 90% exceedence forecast)	"The NMI parameter can be calculated when the data becomes available from DWR, typically every month January through May. Monthly updates include the actual inflows from the previous months. Updates may be implemented as soon as they are available."	New Melones_2009_NMFS-BiOp-IFR schedule (page 54-59).pdf	51-53 of "New Melones_2011_WaterYearTypeDefinition.pdf	54-59 of "New Melones_2009_NMFS-BiOp-IFR schedule (page 54-59).pdf "	N/A		No
Below Goodwin Dam	Stanislaus	Stanislaus River	Yes	IFR below Goodwin Reservoir	Ramping Rates	N/A	11302000	Existing Release Level, Increase or Decrease							New Melones_2009_NMFS-BiOp (page 622)		785 of 844	N/A		No
Below Hunters Reservoir	Stanislaus	Mill Creek	Yes	IFR bl Hunter Reservoir	Flushing and/or Supplemental Flow	P-2699, P-2019	11295340	Day of year		New Melones Reservoir	2019-05-01	CDWR	April-July	May 1-April 30 of the following year	P-2019_UticaProject_2004_FlushingFlowSchedule	2019-04-06	3-4 of 6	SWRCB Condition 1		No
Below Hunters Reservoir	Stanislaus	Mill Creek	Yes	IFR bl Hunter Reservoir	MIF	P-2699, P-2019	11295340	Day of year							P-2699_AngelsProject_2003_OrderIssuingSubsequentLicense		29/83	SWRCB Condition 1		No
Below Lake Alpine	Stanislaus	Silver Creek	No		MIF	P-11563	11293462	Day of year, Water Year Type	"the California Department of Water Resources April or May 1 forecast, whichever is most recent, indicates that the unimpaired inflow for the entire water year into New Melones Reservoir"	New Melones Reservoir	2019-05-01	CDWR	Annual	Presumably for the next 12 months after the May 1 forecast	P-11563_UpperUticaProject_2003_OrderIssuingNewLicense	32/55	36/55	Forest Service Section 4(e) Condition 4	David has decided to exclude this IFR from the model - please ignore. See https://github.com/vicelab/sierra-pywr/issues/10	Yes
Below Lyons Reservoir	Stanislaus	South Fork Stanislaus River	Yes	IFR bl Lyons Res	MIF	P-1061	11298000	Day of year, Inflow, Water Year Type	"as determined by the CDWR"	Not specified	Not specified	CDWR	Not specified	Not specified	P-1061_Pheonix_1994_Rehearing (Acession # 19941019-3043)	40/42	38/42	Article 105		Yes
Below Lyons Reservoir	Stanislaus	South Fork Stanislaus River	Yes	IFR bl Lyons Res	Ramping Rates	P-1061	11298000	None, constant							P-1061_Pheonix_1994_RampingRateModification (Acession # 19940628-0180)		4 of 5	Director Order (A)		No
Below McKays Point Diversion	Stanislaus	North Fork Stanislaus River	Yes	IFR bl McKays Point Div	Ramping Rates	P-2409	11295270	None, constant							P-2409_NorthForkStanislaus_1982_OrderIssuingMajorLicense		26/46	Article 50		No
Below McKays Point Diversion	Stanislaus	North Fork Stanislaus River	Yes	IFR bl McKays Point Div	MIF	P-2409	11295270	Inflows, threshold							P-2409_NorthForkStanislaus_1997_MIF-Releases (Accession # 19971112-0303)		23/46	Director Order (A)		Yes
Below Murphys Powerhouse	Stanislaus	Angels Creek	Yes - added by David	IFR at Murphys Park	MIF	P-2019	11298650	Day of year, Water Year Type	The designation of water year type is based on DWR’s May 1 Stanislaus River forecast of April-July inflows to the New Melones River. The licensee states that it is likely that the water year type, and thus the minimum flow schedule, will change as of May 1, which will occur whenever DWR’s April-July forecast as of May 1 for the current year differs from the forecast of the previous year.	New Melones Reservoir	2019-05-01	CDWR	April-July	May 1-April 30 of the following year	P-2019_UticaProject_2004_FlushingFlowSchedule	2019-03-06	2019-03-06	Licensee's Plan	David is handling the coding of this IFR - see https://github.com/vicelab/sierra-pywr/issues/14	No
Below New Spicer Meadow Reservoir	Stanislaus	Highland Creek	Yes	IFR bl New Spicer Meadow Reservoir	Ramping Rates	P-2409	11294000	None, constant							P-2409_NorthForkStanislaus_1982_OrderIssuingMajorLicense		26/46	Article 50		No
Below New Spicer Meadow Reservoir	Stanislaus	Highland Creek	Yes	IFR bl New Spicer Meadow Reservoir	MIF	P-2409	11294000	None, constant							P-2409_NorthForkStanislaus_1982_OrderIssuingMajorLicense		23/46	Article 37		Yes
Below New Spicer Meadow Reservoir	Stanislaus	Highland Creek	Yes		Reservoir Release Elevation (for temp)	P-2409	11294000	None, constant							P-2409_NorthForkStanislaus_1997_MIF-Releases (Accession # 19971112-0303)		36 of 38 (for temp)	Director order C		No
Below NF Stanislaus Diversion Reservoir	Stanislaus	North Fork Stanislaus River	Yes	IFR bl Utica Div	MIF	P-2409	11293600	Inflows, threshold							P-2409_NorthForkStanislaus_1982_OrderIssuingMajorLicense		23/46	Article 37		Yes
Below NF Stanislaus Diversion Reservoir	Stanislaus	North Fork Stanislaus River	Yes	IFR below NF Stanislaus Diversion Reservoir	Ramping Rates	P-2409	11293600	None, constant							P-2409_NorthForkStanislaus_1982_OrderIssuingMajorLicense		26/46	Article 50		No
Below Philadelphia Diversion	Stanislaus	South Fork Stanislaus River	Yes	IFR bl Philadelphia Div	MIF + Maximum IF	P-2130	11297200	Day of year, Water Year Type	California Department of Water Resource’s (DWR) forecast for annual unimpaired inflow into New Melones Reservoir (as set forth in DWR’s Bulletin 120 entitled Water Conditions in California). The Licensee shall use this determination in implementing articles and conditions of the license that are dependent on water-year type.	New Melones Reservoir	February 1, March 1, April 1, and May 1	CDWR	Annual	In each of February, March and April, the water-year type shall be based on DWR’s forecast for the month and shall apply from the 10th day of the month through the 9th day of the next month. From May 10 through February 9 of the following calendar year, the water-year type shall be based on DWR’s May 1 forecast.	P-2130_SpringGap-Stanislaus_2009_OrderIssuingNewLicense (Accession # 20090424-3049)	67/126	74 of 126	SWRCB Condition 2, Minimum streamflow schedule for the Philadelphia Reach		Yes (Once Pinecrest Lake has reached the specified minimum storage of 500 acre-feet, the minimum required streamflow is the amount indicated, or the inflow to Pinecrest Lake plus accretion flows between Strawberry Dam and Philadelphia Diversion, whichever is less)
Below Philadelphia Diversion	Stanislaus	South Fork Stanislaus River	Yes	IFR bl Philadelphia Div	Ramping Rates	P-2130	11297200	none							P-2130_SpringGap-Stanislaus_2009_OrderIssuingNewLicense (Accession # 20090424-3049)		81 of 126	SWRCB Condition 18		No
Below Pinecrest Lake	Stanislaus	South Fork Stanislaus River	Yes	IFR Below Pinecrest Lake	MIF	P-2130	11296500	Day of year, Water Year Type	The Licensee shall, each year in each of the months of February through May, determine water-year type based on the California Department of Water Resource’s (DWR) forecast for annual unimpaired inflow into New Melones Reservoir (as set forth in DWR’s Bulletin 120 entitled Water Conditions in California). The Licensee shall use this determination in implementing articles and conditions of the lic…	New Melones Reservoir	February 1, March 1, April 1, and May 1	CDWR	Annual	In each of February, March and April, the water-year type shall be based on DWR’s forecast for the month and shall apply from the 10th day of the month through the 9th day of the next month. From May 10 through February 9 of the following calendar year, the water-year type shall be based on DWR’s May 1 forecast.	P-2130_SpringGap-Stanislaus_2009_OrderIssuingNewLicense (Accession # 20090424-3049)	67/126	117-118/126	SWRCB Condition 2, Minimum streamflow schedule for the Pinecrest Reach		Yes (Once Pinecrest Lake has reached the specified minimum storage of 500 acre-feet, the minimum required streamflows is the amount indicated, or the inflow to Pinecrest Lake plus accretion flows from Herring Creek, whichever is less)
Below Pinecrest Lake	Stanislaus	South Fork Stanislaus River	Yes	IFR Below Pinecrest Lake	Ramping Rates	P-2130	11296500	none							P-2130_SpringGap-Stanislaus_2009_OrderIssuingNewLicense (Accession # 20090424-3049)		81 of 126	SWRCB Condition 18		No
Below Relief Reservoir	Stanislaus	Summit Creek	Yes	IFR bl Relief Resersvoir	MIF + Maximum IF	P-2130	11292000	Day of year, Water Year Type	California Department of Water Resources (DWR) forecast for annual unimpaired inflow into New Melones Reservoir as set forth in DWR’s Bulletin 120 entitled Water Conditions in California	New Melones Reservoir	February 1, March 1, April 1, and May 1	CDWR	Annual	In each of February, March and April, the water-year type shall be based on DWR’s forecast for the month and shall apply from the 10th day of the month through the 9th day of the next month. From May 10 through February 9 of the following calendar year, the water-year type shall be based on DWR’s May 1 forecast.	P-2130_SpringGap-Stanislaus_2009_OrderIssuingNewLicense (Accession # 20090424-3049)	67/126	69 of 126	SWRCB Condition 2 "Drawdown of Relief Reservoir and Streamflows in Relief Reach"		No (The specified maximum and minimum streamflows are made up of flow releases from Relief Reservoir, unregulated accretion flows from Kennedy Creek and other sources, as measured at USGS gage 11292000 (PG&E gage S-52) in Kennedy Meadows)
Below Relief Reservoir	Stanislaus	Summit Creek	Yes	IFR bl Relief Resersvoir	Ramping Rates	P-2130	11292000	none							P-2130_SpringGap-Stanislaus_2009_OrderIssuingNewLicense (Accession # 20090424-3049)		81 of 126	SWRCB Condition 18		No
Below Sand Bar Diversion Dam	Stanislaus	Middle Fork Stanislaus River	No	IFR bl Sand Bar Div	Flushing and/or Supplemental Flow	P-2130	11293200	Reservoir Spill Forecast, Water Year Type, Week Number of Supplemental Flow	The Licensee shall, each year in each of the months of February through May, determine water-year type based on the California Department of Water Resource’s (DWR) forecast for annual unimpaired inflow into New Melones Reservoir (as set forth in DWR’s Bulletin 120 entitled Water Conditions in California). The Licensee shall use this determination in implementing articles and conditions of the lic…	New Melones Reservoir	February 1, March 1, April 1, and May 1	CDWR	Annual	In each of February, March and April, the water-year type shall be based on DWR’s forecast for the month and shall apply from the 10th day of the month through the 9th day of the next month. From May 10 through February 9 of the following calendar year, the water-year type shall be based on DWR’s May 1 forecast.	P-2130_SpringGap-Stanislaus_2009_OrderIssuingNewLicense (Accession # 20090424-3049)	67/126	111-114	SWRCB Condition 2, Minimum supplemental flows		No
Below Sand Bar Diversion Dam	Stanislaus	Middle Fork Stanislaus River	No	IFR bl Sand Bar Div	Ramping Rates	P-2130	11293200	none							P-2130_SpringGap-Stanislaus_2009_OrderIssuingNewLicense (Accession # 20090424-3049)		81 of 126	SWRCB Condition 18		No
Below Sand Bar Diversion Dam	Stanislaus	Middle Fork Stanislaus River	Yes	IFR bl Sand Bar Div	MIF	P-2130	11293200	Day of year, Water Year Type	Each year from February through May, Licensee shall determine water-year type based on the California Department of Water Resource’s (DWR) forecast for annual unimpaired inflow into New Melones Reservoir (as set forth in DWR’s Bulletin 120 entitled Water Conditions in California). Licensee shall use this determination in implementing conditions of this certification that are dependent on water-ye…	New Melones Reservoir	February 1, March 1, April 1, and May 1	CDWR	Annual	In each of February, March and April, the water-year type shall be based on DWR’s forecast for the month and shall apply from the 10th day of the month through the 9th day of the next month. From May 10 through February 9 of the following calendar year, the water-year type shall be based on DWR’s May 1 forecast.	P-2130_SpringGap-Stanislaus_2009_OrderIssuingNewLicense (Accession # 20090424-3049)	67/126	70/126	SWRCB Condition 2, Minimum supplemental flows		Yes
Below Utica Reservoir	Stanislaus	North Fork Stanislaus River	Yes	IFR Below Uitca Res	MIF	P-11563	11293372	None, constant							P-11563_UpperUticaProject_2003_OrderIssuingNewLicense		37/55	Forest Service Section 4(e) Condition 4		No
From Collierville Powerplant *PENDING CONFIRMATION FROM OPERATOR*	Stanislaus	Stanislaus River	No	IFR bl Collierville PH Discharge	Ramping Rates	P-2409	11295250	None, constant							P-2409_NorthForkStanislaus_1982_OrderIssuingMajorLicense		26/46	Article 50		No
Pinecrest Lake	Stanislaus	N/A	Yes		Reservoir Requirement	P-2130	11295900	Unsure							P-2130_SpringGap-Stanislaus_2009_OrderIssuingNewLicense (Accession # 20090424-3049)		74/126	SWRCB Condition 2, Minimum streamflow schedule for the Philadelphia Reach (cfs)		No
Relief Reservoir	Stanislaus	N/A	Yes		Reservoir Requirement	P-2130	11291000	None, constant							P-2130_SpringGap-Stanislaus_2009_OrderIssuingNewLicense (Accession # 20090424-3049)		68/126	SWRCB Condition 2; Operational Objectives		No
Tulloch Reservoir	Stanislaus	N/A	N/A?		Reservoir Requirement	P-2067	11299995	Day of year							P-2067_Tulloch_2006_OrderIssuingNewLicense		3 of 49	SWRCB Condition 4		No
Below Cherry Lake (Lake Lloyd)	Tuolumne	Cherry Creek	Yes	IFR bl Cherry Lake	MIF	N/A	11277300	Time of year							Hetch-Hetchy Project Requirements (SfPlanning).pdf		14 of 193	N/A		No
Below La Grange Diversion Dam	Tuolumne	Tuolumne River	Yes	IFR bl Don Pedro Reservoir	MIF	N/A	11289650	Day of year, Water Year Type	CDWR San Joaquin 60-20-20 Index	Don Pedro Reservoir	2019-04-01	CDWR	Unique 60-20-20 formula: 60 percent of the current year’s April through July inflow to Don Pedro Reservoir, plus 20 percent of the current year’s October through March inflow to Don Pedro Reservoir, plus 20 percent of the previous year’s index (i.e., 20 percent of the total unregulated inflow to Don Pedro Reservoir).	April 15 to April 14 of the next calendar year	P-2299_DonPedro_2019_Relicensing-DEIS	176/794	177/794	N/A		No
Below La Grange Diversion Dam	Tuolumne	Tuolumne River	Yes	IFR bl Don Pedro Reservoir	Flushing and/or Supplemental Flow	N/A	11289650	Day of year, Water Year Type	CDWR San Joaquin 60-20-20 Index	Don Pedro Reservoir	2019-04-01	CDWR	Unique 60-20-20 formula: 60 percent of the current year’s April through July inflow to Don Pedro Reservoir, plus 20 percent of the current year’s October through March inflow to Don Pedro Reservoir, plus 20 percent of the previous year’s index (i.e., 20 percent of the total unregulated inflow to Don Pedro Reservoir).	April 15 to April 14 of the next calendar year	P-2299_DonPedro_2019_Relicensing-DEIS	176/794	177/794	N/A		No
Below La Grange Diversion Dam [1964]	Tuolumne	Tuolumne River	Yes	IFR bl Don Pedro Reservoir	Ramping Rates	P-2299	11289650								P-2299_DonPedro_1964_OrderIssuingLicense		25 of 47	Article 38		No
Below La Grange Diversion Dam [1996]	Tuolumne	Tuolumne River	Yes	IFR bl Don Pedro Reservoir	Ramping Rates	P-2299	11289650								P-2299_DonPedro_1996_SettlementAgreement		11 of 32			No
Below Lake Eleanor	Tuolumne	Eleanor Creek	Yes	IFR bl Lake Eleanor	MIF	N/A	11278000	Time of year, whether pumping occurs b/t Lake Eleanor and Lake Lloyd							Hetch-Hetchy Project Requirements (SfPlanning).pdf		14 of 193	N/A		No
Below O’Shaughnessy Dam	Tuolumne	Tuolumne River	Yes	IFR bl hetch Hetchy Reservoir	MIF	N/A	11276500	If flow through Hetch Hetchy Aqueduct surpasses a threshold	Based on Precipitaton at Hetch Hetchy Reservoir and inflows into Hetch Hetchy Resersvoir	Hetch Hetchy Reservoir	Monthly, from January to August	SFPUC	Not a forecast - based on observed cumulative precipitation (since begining of Water Year) or observed reservoir storage volume	One month (from January - July), then August classification persists until January of the following calendar year	Hetch-Hetchy Project Requirements (SfPlanning).pdf	14 of 193	14 of 193	N/A		No
Below O’Shaughnessy Dam	Tuolumne	Tuolumne River	Yes	IFR bl hetch Hetchy Reservoir	Flushing and/or Supplemental Flow	N/A	11276500	Complex process - see document							O'Shaughnessy Dam Instream Flow Management Plan 04-11-2014.pdf		183-186	N/A		No
Don Pedro Reservoir	Tuolumne	N/A	Yes	N/A	Reservoir Requirement	N/A	11287500	None, constant							P-2299_DonPedro_2019_Relicensing-DEIS		172/794	N/A		No
Above Shakeflat Creek	USJ	San Joaquin River	Yes	IFR above Shakeflat Creek	MIF	P-2085	11234760	Day of year, Water Year Type	CA DWR San Joaquin River index	Millerton Lake	2019-04-01	CDWR	April-July	April 16 to April 15. Note: The dry year schedule may be applied for a period not to exceed the subsequent 12 consecutive months commencing on April 16.	Initial Information Package for the Big Creek Hydroelectric System (2000)	70-72	70-72			No
Bass Lake	USJ	N/A	No	None	Reservoir Requirement	P-1354	11243400	Time of year, reservoir elevation	None						P-1354_CraneValleyProject_2003_OrderIssuingNewLicense		62 of 75	Forest Service provision Condition no. 10		No
Below Balsam Meadows Forebay	USJ	Balsam Creek	No	None	MIF	P-67	11238270	Time of year, inflows	None						Initial Information Package for the Big Creek Hydroelectric System (2000)		70-71			Yes (in this case diversions are turned out; therefore, flows in a diverted reach may drop below the minimum instream flow requirement when SCE is not diverting)
Below Bass Lake	USJ	North Fork Willow Creek	Yes	IFR bl Bass Lake	MIF	P-1354	11244000	None, constant	None						P-1354_CraneValleyProject_2003_OrderIssuingNewLicense		57 of 75	Forest Service provision Condition no. 4		Yes
Below Bear Diversion Reservoir	USJ	Bear Creek	Yes	IFR bl Bear Div	MIF	P-67	11230530	Day of year, Inflow, Water Year Type	Forecasted April-July runoff of SJ River at Friant Dam	Millerton Lake	2019-04-01	USBR	April-July	May 1-April 30 of the following year	Initial Information Package for the Big Creek Hydroelectric System (2000)	70-72	22-23/43	Article 37		Yes
Below Big Creek 6 Div	USJ	San Joaquin River	Yes	IFR bl Big Creek 6 Div	MIF	P-120	11238600	None, constant	None						Initial Information Package for the Big Creek Hydroelectric System (2000)		70-72			No
Below Big Creek PP No. 2A / Dam No. 5	USJ	Big Creek	Yes	IFR bl Big Creek 5 Div	MIF	P-67	11238500	Day of year, Inflow, Water Year Type	Forecasted April-July runoff of SJ River at Friant Dam	Millerton Lake	2019-04-01	USBR	April-July	May 1-April 30 of the following year	Initial Information Package for the Big Creek Hydroelectric System (2000)	70-72	22-23/43	Article 37		Yes
Below Bolsillo Creek Diversion	USJ	Bolsillo Creek	Yes	IFR bl Bolsillo Creek Div	MIF	P-67	11230670	Inflows	None						P-67_1978_BigCreek2A&8_1978_OrderIssuingNewLicense(Major)		22-23/43	Article 37		Yes
Below Browns Creek Ditch	USJ	South Fork Willow Creek	Yes	IFR bl Browns Creek Ditch	MIF	P-1354		Day of year, Inflow, Water Year Type		Whole San Joaquin River Basin (San Joaquin Valley Index)	2019-05-01	CDWR	Unique 60-20-20 formula	Not Specified	P-1354_CraneValleyProject_2003_OrderIssuingNewLicense	57 of 75	57 of 75	Forest Service provision Condition no. 4		Yes
Below Camp 62 Creek Diversion	USJ	Camp 62 Creek	Yes	IFR bl Camp 62 Creek Div	MIF	P-67	11230600	Inflows	None						P-67_1978_BigCreek2A&8_1978_OrderIssuingNewLicense(Major)		22-23/43	Article 37		Yes
Below Chilkoot Lake	USJ	Chilkoot Creek	No	None	Maximum IF	P-1354		None, constant	None						P-1354_CraneValleyProject_2003_OrderIssuingNewLicense		41 of 75	Article 404	Yes, see https://github.com/vicelab/sierra-pywr/issues/29	No
Below Chinquapin Creek Diversion	USJ	Chinquapin Creek	Yes	IFR bl Chinquapin Creek Div	MIF	P-67	11230560	Time of year, inflows	None						P-67_1978_BigCreek2A&8_1978_OrderIssuingNewLicense(Major)		22-23/43	Article 37		Yes
Below Hooper Cr Diversion	USJ	Hooper Creek	No	IFR bl Hooper Creek	MIF	P-67	11230200	Inflows	None						Initial Information Package for the Big Creek Hydroelectric System (2000)		70-71		David decided to exclude this IFR - please ignore - see https://github.com/vicelab/sierra-pywr/issues/24	Yes
Below Hooper Creek	USJ	South Fork San Joaquin River	No	None	MIF	P-67	11230215	Day of year, Inflow, Water Year Type	Forecasted April-July runoff of SJ River at Friant Dam	Millerton Lake	2019-04-01	USBR	April-July	May 1-April 30 of the following year.	Initial Information Package for the Big Creek Hydroelectric System (2000)	70-72	70-71		Has not been added to model by David, but he plans to: https://github.com/vicelab/sierra-pywr/issues/23	Yes
Below Huntington Lake	USJ	Big Creek	Yes	11302000	MIF	P-2175	11237000	Time of year	None						P-2175_BigCreek1&2_1959_OrderIssuingLicense		8 of 24	Article 28		No
Below Kerckhoff Dam	USJ	San Joaquin River	Yes	IFR bl Kerckhoff Lake	MIF	P-96	11246700	None, constant	None						P-96_Kerckhoff_1979_OrderIssuingMajorLicense		7 of 11	Article 45		No
Below Lake Thomas A. Edison	USJ	Mono Creek	Yes	IFR bl Thomas A Edison	MIF	P-2086	11231500	None, constant	None						Initial Information Package for the Big Creek Hydroelectric System (2000)		70-71		Might be missing from the model, though it should be added in soon- see https://github.com/vicelab/sierra-pywr/issues/26	Yes
Below Manzanita Lake Dam	USJ	North Fork Willow Creek	Yes	IFR bl Manzanita Div	MIF	P-1354		None, constant	None						P-1354_CraneValleyProject_2003_OrderIssuingNewLicense		57 of 75	Forest Service provision Condition no. 4		Yes
Below Millerton Lake	USJ	San Joaquin River	Yes	SAN-N-FLO1	MIF	P-2892	11251000	Day of year, Water Year Type	Unimpaired Water Year Runoff Forecast, at Friant	Millerton Lake	January 20 through July 10, updated on at least a monthly basis.	Incorporates modelling from BOR, CADWR, and others.	Extremely complex system - please see page 34-35 of "2006 Friant Settlement Agreement Visual Flow Schedule" and decide on how to simplify their methods.	The first Restoration Allocation and Default Flow Schedule shall be issued on or before January 20 of each year. Restoration Allocations will be updated at least monthly, typically timed with the release of DWR’s Bulletin 120 monthly report, unless both Reclamation and the Restoration Administrator determine that an allocation update is not necessary. Reclamation may issue an updated Restoration …	2006 Friant Settlement Agreement Visual Flow Schedule	38	35, 36, 77-79, 89			No
Below Mono Creek Diversion	USJ	Mono Creek	Yes	IFR bl Mono Creek Div	MIF	P-67	11231600	Day of year, Inflow, Water Year Type	Forecasted April-July runoff of SJ River at Friant Dam	Millerton Lake	2019-04-01	USBR	April-July	May 1-April 30 of the following year	Initial Information Package for the Big Creek Hydroelectric System (2000)	70-72	22-23/43	Article 37		Yes
Below Pitman Creek Diversion	USJ	Pitman Creek	Yes	IFR bl Pitman Creek Div	MIF	P-67	11237700	Inflows	None						P-67_1978_BigCreek2A&8_1978_OrderIssuingNewLicense(Major)		22-23/43	Article 37		Yes
Below Redinger Lake	USJ	San Joaquin River	Yes	IFR bl Redinger Lake	MIF	P-2017	11242000	Day of year, Water Year Type	CA DWR San Joaquin River index	Whole San Joaquin River Basin (San Joaquin Valley Index)	2019-05-01	CDWR	Unique 60-20-20 formula	From October 1 (following the April 1 forecast of a Dry or Critically Dry Water Year) to April 1	P-2017_BigCreek4_2003_OrderIssuingNewLicense	65/74	65/74	Forest Service Condition 5		No
Below San Joaquin 1 Diversion	USJ	Willow Creek	Yes	IFR bl San Joaquin 1 Div	MIF	P-1354	11246500	None, constant	None						P-1354_CraneValleyProject_2003_OrderIssuingNewLicense		57 of 75	Forest Service provision Condition no. 4		Yes
Below Shaver Lake	USJ	Stevenson Creek	Yes	IFR bl Shaver Lake	MIF	P-67	11241500	Time of year, inflows	None						P-67_1978_BigCreek2A&8_1978_OrderIssuingNewLicense(Major)		22-23/43	Article 37		Yes
Below Warm Creek Diversion	USJ	Warm Creek	No	None	MIF	P-2086	11231700	None, constant	None						Initial Information Package for the Big Creek Hydroelectric System (2000)		70-71		David decided to exclude this IFR, please ignore (https://github.com/vicelab/sierra-pywr/issues/27)	Yes
Florence Lake	USJ	N/A	No	None	Reservoir Requirement	P-67	11229600	Time of year	None						P-67_1978_BigCreek2A&8_1978_OrderIssuingNewLicense(Major)		22/43	Article 37		No
No. Fk. Stevenson Creek above Shaver Lake	USJ	North Fork Stevenson Creek	Yes	IFR bl Tunnel 7 Div	MIF	P-67	11239300	Day of year, Inflow, Water Year Type	April 1 forecast of the U.S. Bureau of Reclamation of the April-July natural runoff of the San Joaquin River at Friant Dam	Millerton Lake	2019-04-01	USBR	April-July	May 1 to April 30. Note: But, a dry year reverts to a normal year within 7 days of a subsequent CDWR February 1 or March 1 forecast of normal runoff.	Initial Information Package for the Big Creek Hydroelectric System (2000)	70-72	70-71			Yes
Shaver Lake	USJ	N/A	No	None	Reservoir Requirement	P-67	11239500	Day of year, Water Year Type	Forecasted April-July runoff of SJ River at Friant Dam	Millerton Lake	2019-04-01	USBR	April-July	June 15 through September 1 (Note: for the rest of the year, Sept. 1 - June 15, a minimum reservoir elevation of 5,268.73 feet is always required)	P-67_1978_BigCreek2A&8_1978_OrderIssuingNewLicense(Major)		22-23/43	Article 37		No
Through Kerckhoff PP No. 1 and No. 2	USJ	San Joaquin River	No	None	MIF	P-96	11246950 (Kerckoff PP No. 1) and 11247050 (Kerckoff PP No. 2)	reservoir elevation, time of year	None						P-96_Kerckhoff_1993_OrderEstablishingPermanentFlowRegime (Accession # 19930505-0319)		5 of 5	Director Order A	David has decided to exclude this IFR - please ignore. See https://github.com/vicelab/sierra-pywr/issues/35	No
